# Supplementary material for: Properties and structures of commercial polygalacturonase with ultrasound treatment: role of ultrasound in enzyme activation
Source: Royal Society of Chemistry journal article supplement (doi:10.1039/c5ra19425c), 2015-01-01
Supplement: c5ra19425c1.pdf [file c5ra19425c1.pdf]

## Supplementary information

**Table A. 1**

Evaluation of single fraction and two-fraction first order models for determination of thermal inactivation of PG with or without ultrasound treatment at 40 °C (mean  $\pm$  SD).

| Parameters | Control             |                     | With ultrasound     |                     |
|------------|---------------------|---------------------|---------------------|---------------------|
|            | Single-fraction     | Two-fraction        | Single-fraction     | Two-fraction        |
| $A_L$      | -                   | 31.05 $\pm$ 3.09    | -                   | 16.61 $\pm$ 4.86    |
| $A_S$      | -                   | 68.79 $\pm$ 2.82    | -                   | 83.19 $\pm$ 4.81    |
| $k_L$      | 0.0323 $\pm$ 0.0022 | 0.2661 $\pm$ 0.0506 | 0.0206 $\pm$ 0.0012 | 0.2066 $\pm$ 0.0967 |
| $k_S$      | -                   | 0.0156 $\pm$ 0.0017 | -                   | 0.0125 $\pm$ 0.0022 |
| $R^2$      | 0.8182              | 0.9972              | 0.9190              | 0.9937              |
